# Supplementary material for: The Cultivation of Chelidonium majus L. Increased the Total Alkaloid Content and Cytotoxic Activity Compared with Those of Wild-Grown Plants
Source: MDPI journal article supplement (doi:10.3390/plants10091971), 2021-09-21
Supplement: s1 [file s1]

Supplementary data to :

## The Cultivation of *Chelidonium majus* L. Increased the Total Alkaloid Content and Cytotoxic Activity Compared with Those of Wild-Grown Plants

**Supplementary Table S1.** Content of alkaloids ( $\mu\text{g/g}$  of dry material) in aqueous ethanol extracts of wild and cultivated *C. majus* specimen

| Sample                 | Sanguinarine | Chelerythrine | Chelidone   | Coptisine      | Berberine      | Alloperine     |
|------------------------|--------------|---------------|-------------|----------------|----------------|----------------|
|                        | e            | e             | e           | e <sup>1</sup> | e <sup>1</sup> | e <sup>1</sup> |
| <b>Wild 2019</b>       |              |               |             |                |                |                |
| CHM01                  | 1.6          | 3.9           | 77.6        | 144.5          | 11.7           | 7.8            |
| CHM02                  | 0.2          | 2.8           | 19.8        | 172.9          | 12.8           | 5.8            |
| CHM03                  | 1.4          | 5.7           | 69.1        | 162.1          | 16.8           | 6.2            |
| CHM04                  | 0.8          | 2.8           | 39.8        | 81.6           | 5.6            | 6.1            |
| CHM05                  | 5.4          | 2.4           | 111.5       | 131.4          | <LOD           | <LOD           |
| Average:               | <b>1.9</b>   | <b>3.5</b>    | <b>63.6</b> | <b>138.5</b>   | <b>11.7</b>    | <b>6.5</b>     |
| SD:                    | 2.1          | 1.3           | 35.4        | 35.6           | 4.6            | 0.9            |
| <b>Cultivated 2020</b> |              |               |             |                |                |                |
| CHM01                  | 12.1         | 25.7          | 215.0       | 132.3          | 15.4           | 18.2           |
| CHM02                  | 10.5         | 20.2          | 217.0       | 169.5          | 21.7           | 16.0           |
| CHM03                  | 9.8          | 11.9          | 105.3       | 114.4          | 9.1            | 9.3            |
| CHM04                  | 12.7         | 23.8          | 255.0       | 116.0          | 17.4           | 16.0           |
| CHM05                  | 19.0         | 5.7           | 468.4       | 185.2          | 0.2            | <LOD           |
| Average:               | 12.8         | 17.5          | 252.1       | 143.5          | 12.8           | 14.9           |
| SD:                    | 3.6          | 8.5           | 133.2       | 32.2           | 8.4            | 3.8            |

<sup>1</sup> Calculated as chelidone

**Supplementary Table S2.** Content of flavonoid (µg/g of dry material) in aqueous ethanol extracts of wild and cultivated *C. majus* specimen

| Sample                 | Kaempferol | Isorhamnetin | Quercitrin | Isorhamnetin 3-O-rutinoside | Kaempferol 3-O-rutinoside | Quercetin-3-O-rutinoside | Quercetin 3-O-galactoside | Kaempferol glucoside <sup>1</sup> |
|------------------------|------------|--------------|------------|-----------------------------|---------------------------|--------------------------|---------------------------|-----------------------------------|
| <b>Wild 2019</b>       |            |              |            |                             |                           |                          |                           |                                   |
| CHM01                  | 3.90       | 2.88         | 0.89       | 1407                        | 286                       | 2730                     | 38.81                     | 27.11                             |
| CHM02                  | 28.38      | 20.43        | 3.32       | 2834                        | 1263                      | 4966                     | 657.40                    | 336.74                            |
| CHM03                  | 12.79      | 7.52         | 1.86       | 1637                        | 726                       | 3472                     | 309.04                    | 199.70                            |
| CHM04                  | 9.98       | 6.27         | 0.39       | 1008                        | 561                       | 1825                     | 56.22                     | 53.98                             |
| CHM05                  | 10.53      | 7.01         | 0.54       | 1177                        | 433                       | 2044                     | 39.71                     | 62.07                             |
| Average:               | 13.12      | 8.82         | 1.40       | 1613                        | 654                       | 3007                     | 220.23                    | 135.92                            |
| SD:                    | 9.15       | 6.74         | 1.22       | 722                         | 377                       | 1270                     | 269.91                    | 130.77                            |
| <b>Cultivated 2020</b> |            |              |            |                             |                           |                          |                           |                                   |
| CHM01                  | 5.55       | 3.02         | 1.12       | 1461                        | 274                       | 3517                     | 74.95                     | 55.93                             |
| CHM02                  | 6.91       | 5.15         | 2.80       | 2174                        | 706                       | 5539                     | 330.99                    | 61.14                             |
| CHM03                  | 13.99      | 6.27         | 3.13       | 1824                        | 802                       | 5690                     | 300.87                    | 68.25                             |
| CHM04                  | 4.39       | 2.96         | 1.50       | 1630                        | 490                       | 3241                     | 158.50                    | 35.00                             |
| CHM05                  | 3.53       | 2.82         | 1.65       | 2196                        | 731                       | 3938                     | 114.42                    | 47.02                             |
| Average:               | 6.87       | 4.05         | 2.04       | 1857                        | 601                       | 4385                     | 195.95                    | 53.47                             |
| SD:                    | 4.18       | 1.57         | 0.87       | 326                         | 216                       | 1151                     | 113.95                    | 12.90                             |

<sup>1</sup> calculated as Luteolin-7-O-glucoside

**Supplementary Table S3.** Collection site and geographical coordinates of *Chelidonium majus* populations

| Population | Municipality | Latitude | Longitude | Altitude, m |
|------------|--------------|----------|-----------|-------------|
| CHM01      | Pededze      | 57.4408  | 27.32869  | 141         |
| CHM02      | Mērnīeki     | 57.84682 | 24.4897   | 24          |
| CHM03      | Ainaži       | 57.86635 | 24.35775  | 46          |
| CHM04      | Viļaka       | 57.17996 | 27.6809   | 93          |
| CHM05      | Sigulda      | 57.15394 | 24.89847  | 98          |

**Supplementary Table S4.** MRM parameters applied for the analysis of alkaloids in *C. majus* extracts

| Compound                    | MS/MS                                    | Cone, V | Collision energy, eV |
|-----------------------------|------------------------------------------|---------|----------------------|
| Chelerythrine               | 348 → 303.94, 348 → 332.94               | 30      | 20                   |
| Chelidonine                 | 354 → 275, 354 → 305                     | 30      | 20                   |
| Sanguinarine                | 332 → 273.97, 332 → 303.96, 332 → 316.93 | 30      | 20                   |
| Coptisine <sup>1</sup>      | 320 → 291.98, 320 → 317.97               | 30      | 20                   |
| Berberine <sup>1</sup>      | 336 → 291.99, 336 → 321                  | 30      | 20                   |
| Allocryptopine <sup>1</sup> | 370 → 188, 370 → 352.01                  | 30      | 20                   |

<sup>1</sup> Parameters set tentative

**Supplementary Table S5.** MRM parameters applied for the analysis of flavonoid glycoside in *C. majus* extracts

| Test compound               | MRM transition   | Cone voltage, V | Collision energy, eV |
|-----------------------------|------------------|-----------------|----------------------|
| Kaempferol                  | 287→121, 287→165 | 25              | 30                   |
| Isorhamnetin                | 317→153, 317→229 | 30              | 30                   |
| Quercitrin                  | 449→303          | 30              | 25                   |
| Isorhamnetin-3-O-rutinoside | 625→317          | 25              | 20                   |
| Kaempferol 3-rutinoside     | 595→287          | 30              | 15                   |
| Quercetin 3-O-rutinoside    | 611→303          | 30              | 20                   |
| Quercetin 3-O-galactoside   | 465→303          | 30              | 15                   |
| Luteolin 7-O-glucoside      | 449→287          | 30              | 15                   |
| Reserpine (IS)              | 609→195          | 50              | 35                   |

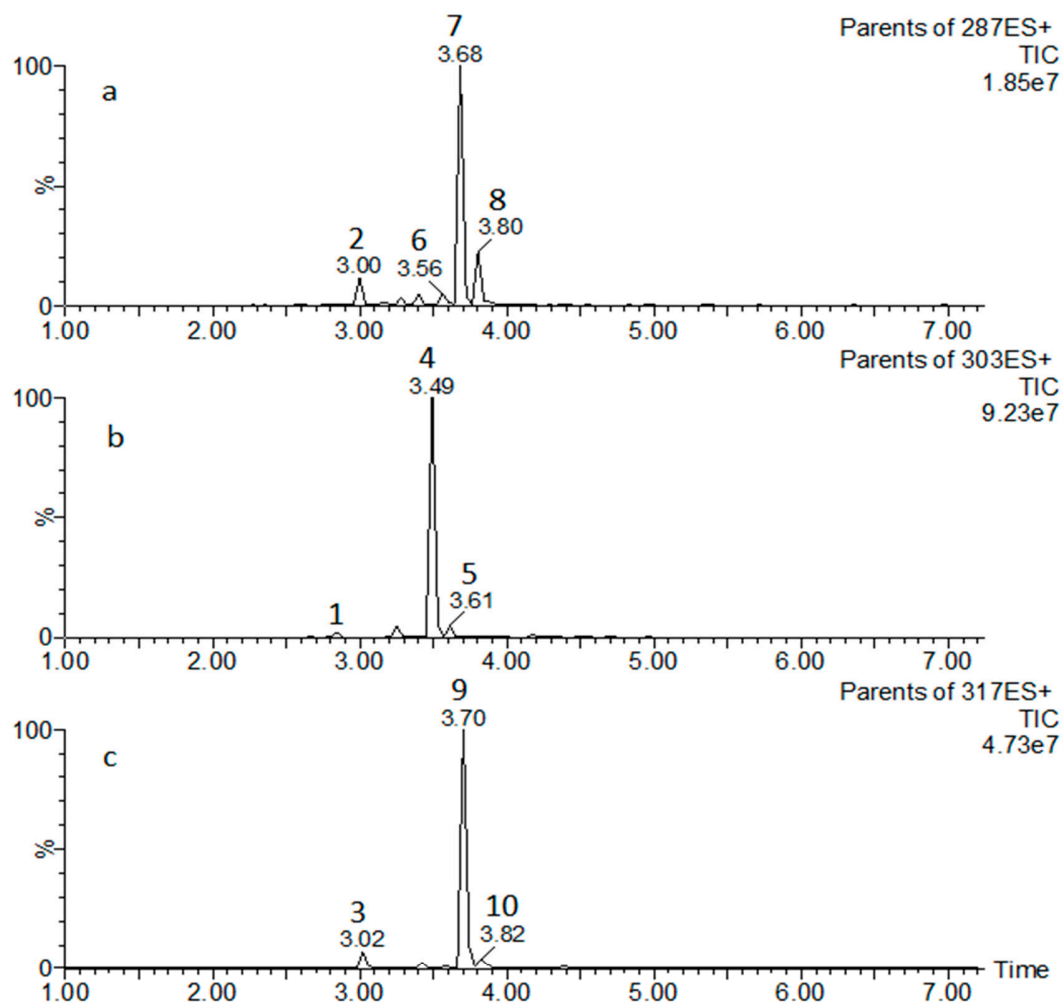

**Supplementary Figure S1.** Flavonoid aglycone extracted mass chromatograms (parent search): kaempferol (a), quercetin (b), isorhamnetin (c). Peak identification in Table 3.

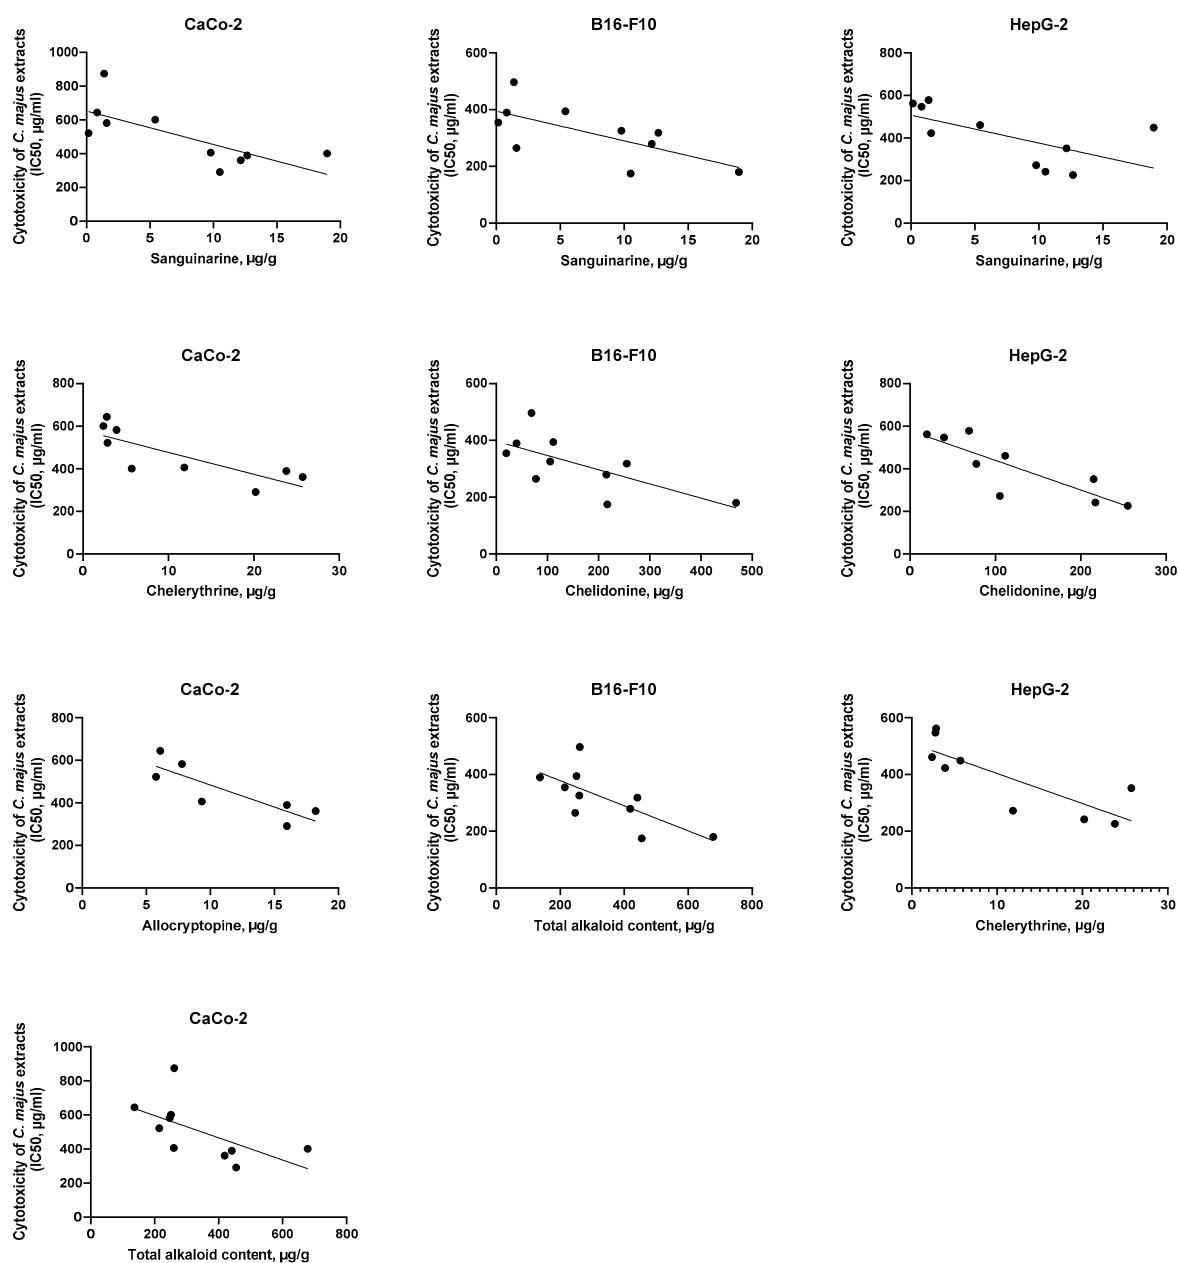

**Supplementary Figure S2.** Correlations between IC<sub>50</sub> values of cytotoxic activities of *C. majus* extracts measured by MTT assay in three cell lines (CaCo-2, B16-F10 and HepG-2) and concentration of the alkaloids identified in the extracts by liquid chromatography – tandem mass spectrometry. The data were analyzed by the Pearson's correlation test using GraphPad Prism 8.0. Statistically significant correlations are shown in the figure. A value of  $p < 0.05$  was considered to be statistically significant.
